# Supplementary material
Source: PubMed Central journal article supplement (PMC2882139)

# wild-type

st14

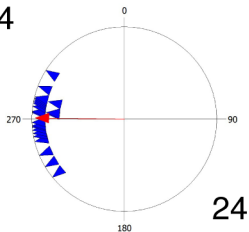

st15

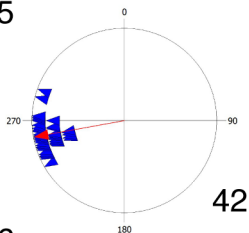

st16

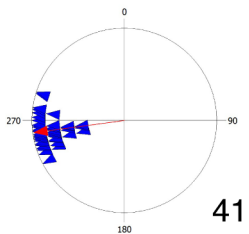

# *netA*

st14

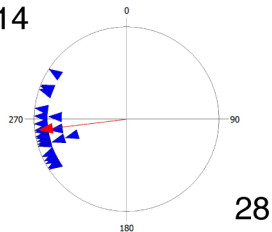

st15

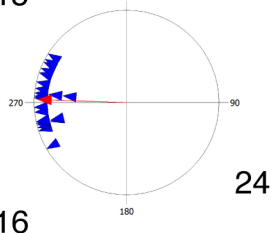

st16

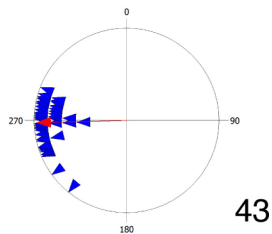

Supplement: supp_137.13.2227_047795FigS1.pdf [file supp_137.13.2227_047795FigS1.pdf]

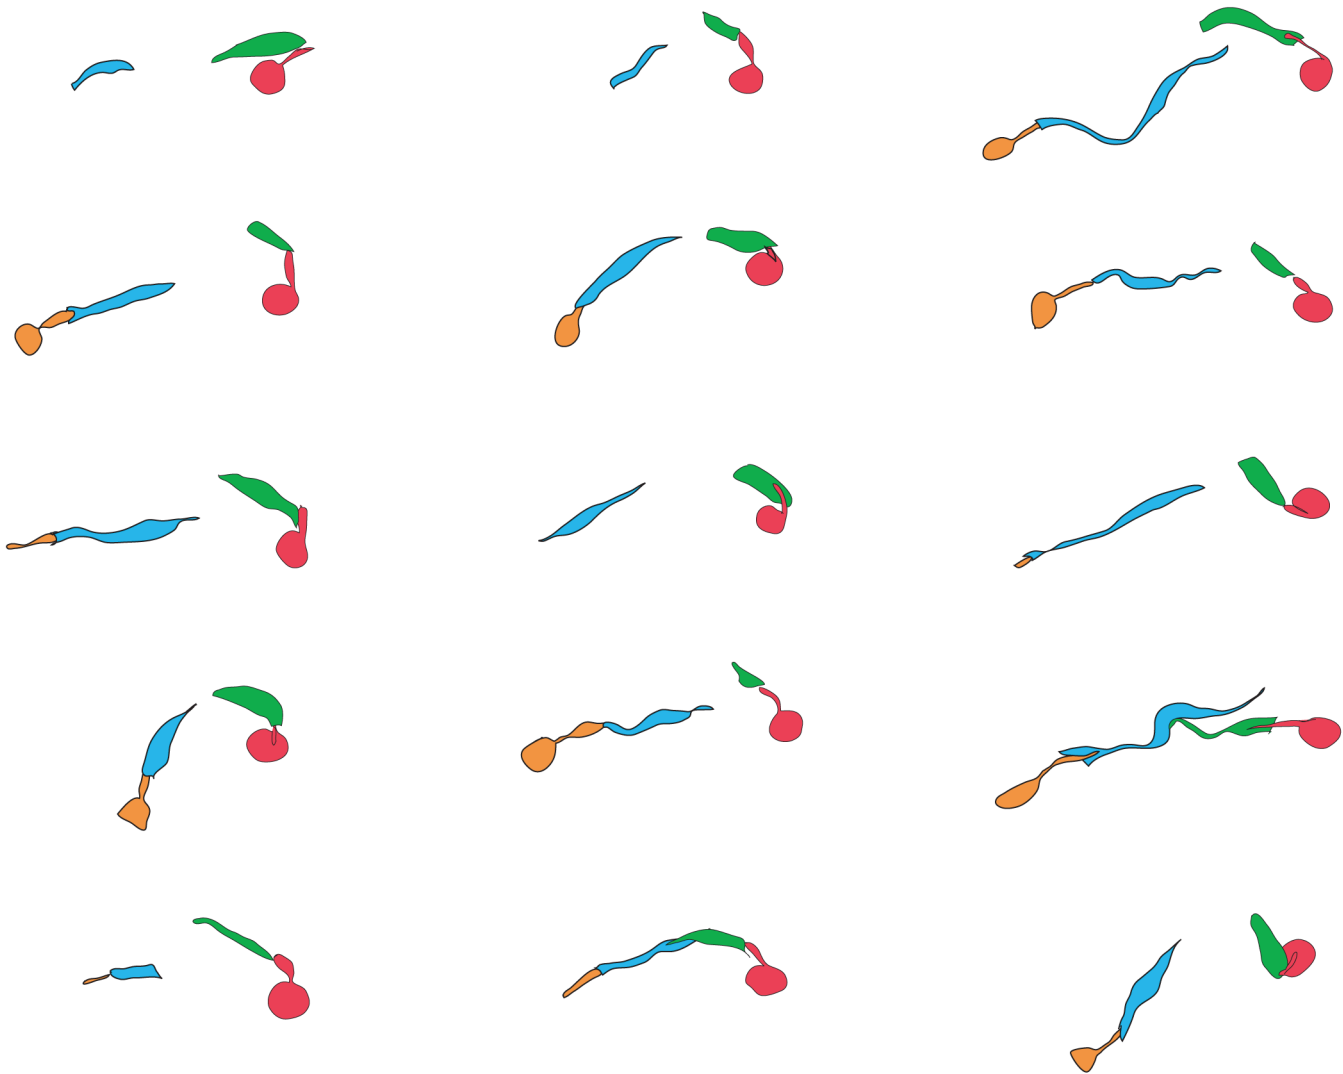

Supplement: supp_137.13.2227_047795FigS2.pdf [file supp_137.13.2227_047795FigS2.pdf]

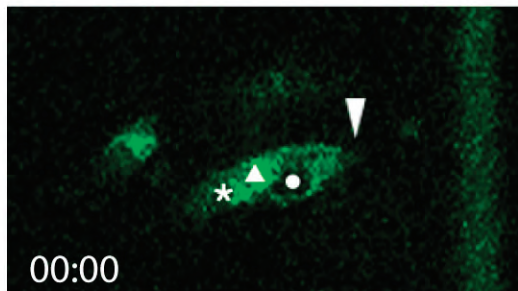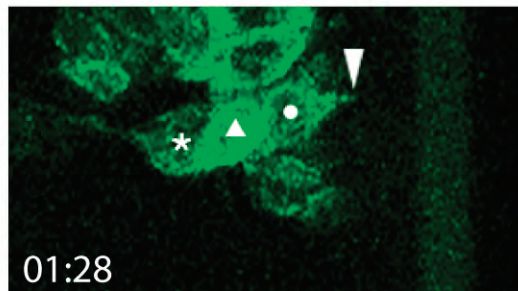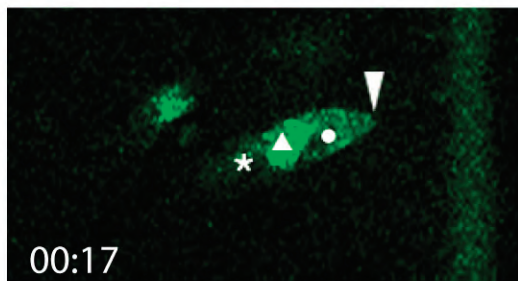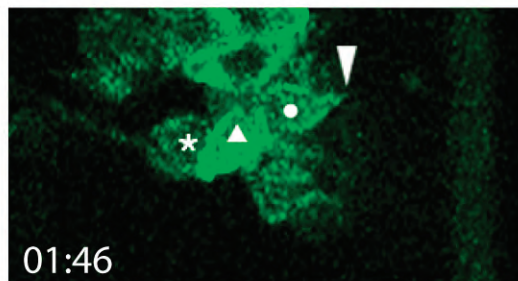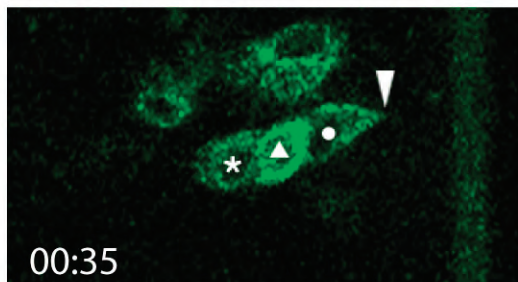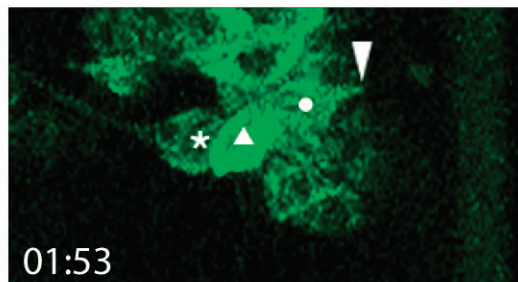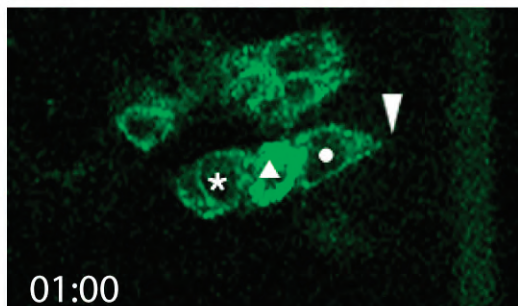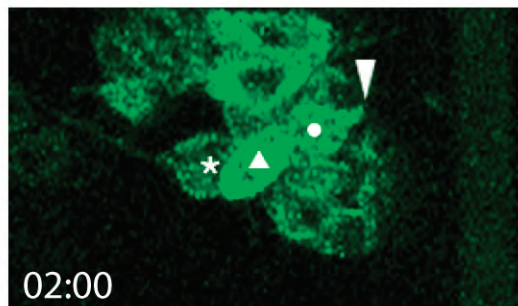

Supplement: supp_137.13.2227_047795FigS3.pdf [file supp_137.13.2227_047795FigS3.pdf]

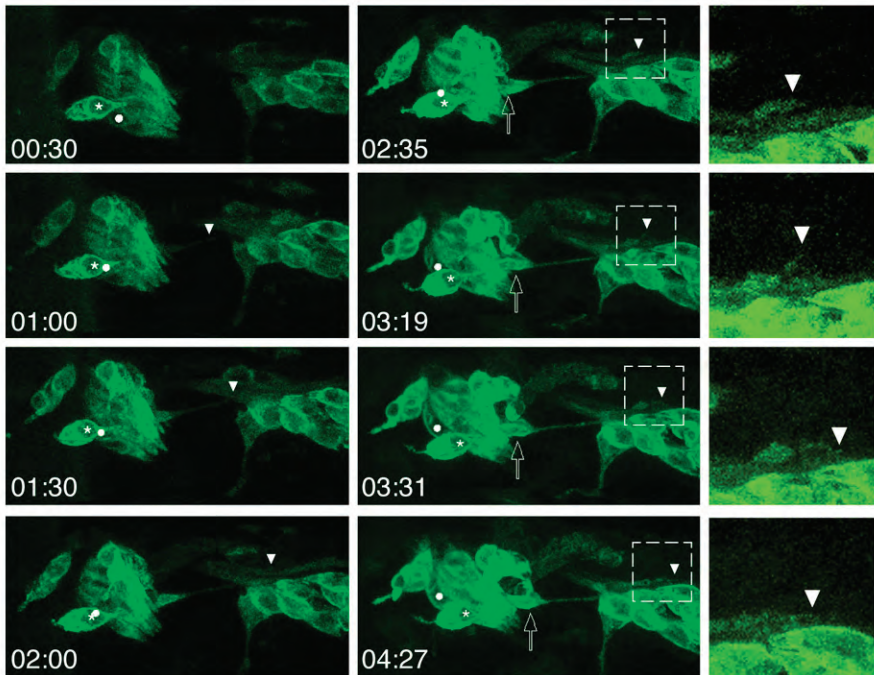

Supplement: supp_137.13.2227_047795FigS4.pdf [file supp_137.13.2227_047795FigS4.pdf]

**Wild-type**

***fra/netA***

St13

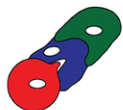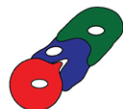

St14

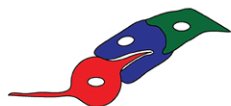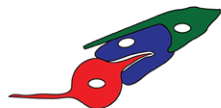

St15

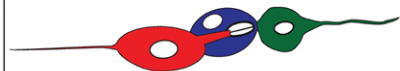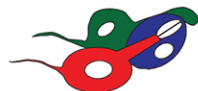

St16

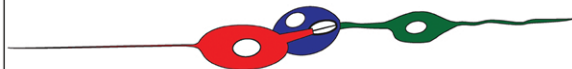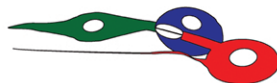

Supplement: supp_137.13.2227_047795FigS5.pdf [file supp_137.13.2227_047795FigS5.pdf]

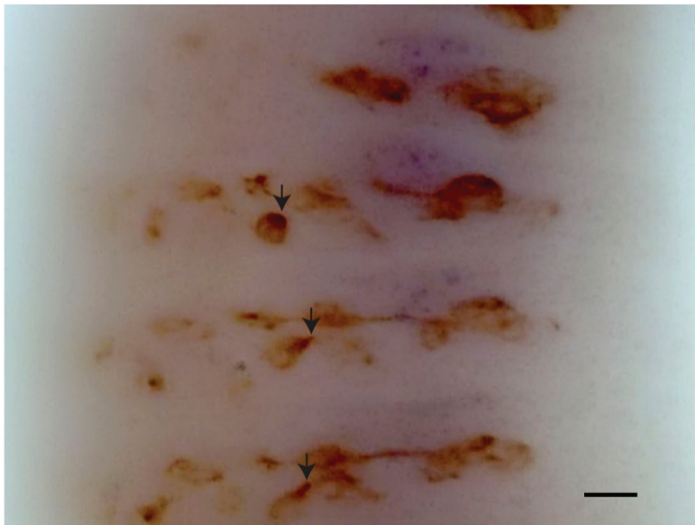

Supplement: supp_137.13.2227_047795FigS6.pdf [file supp_137.13.2227_047795FigS6.pdf]

**A***MZ97-GAL4/UAS-netA*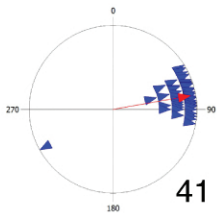

41

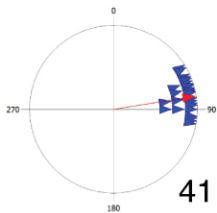

41

*sal-GAL4/UAS-netA*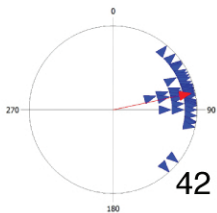

42

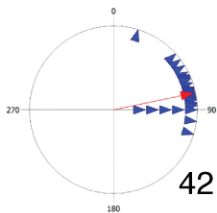

42

site of exit

dendrite direction

**B**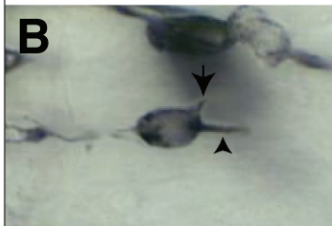**C**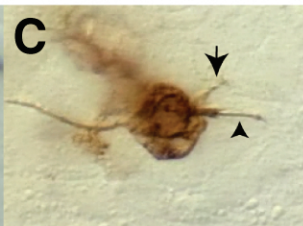

Supplement: supp_137.13.2227_047795FigS7.pdf [file supp_137.13.2227_047795FigS7.pdf]

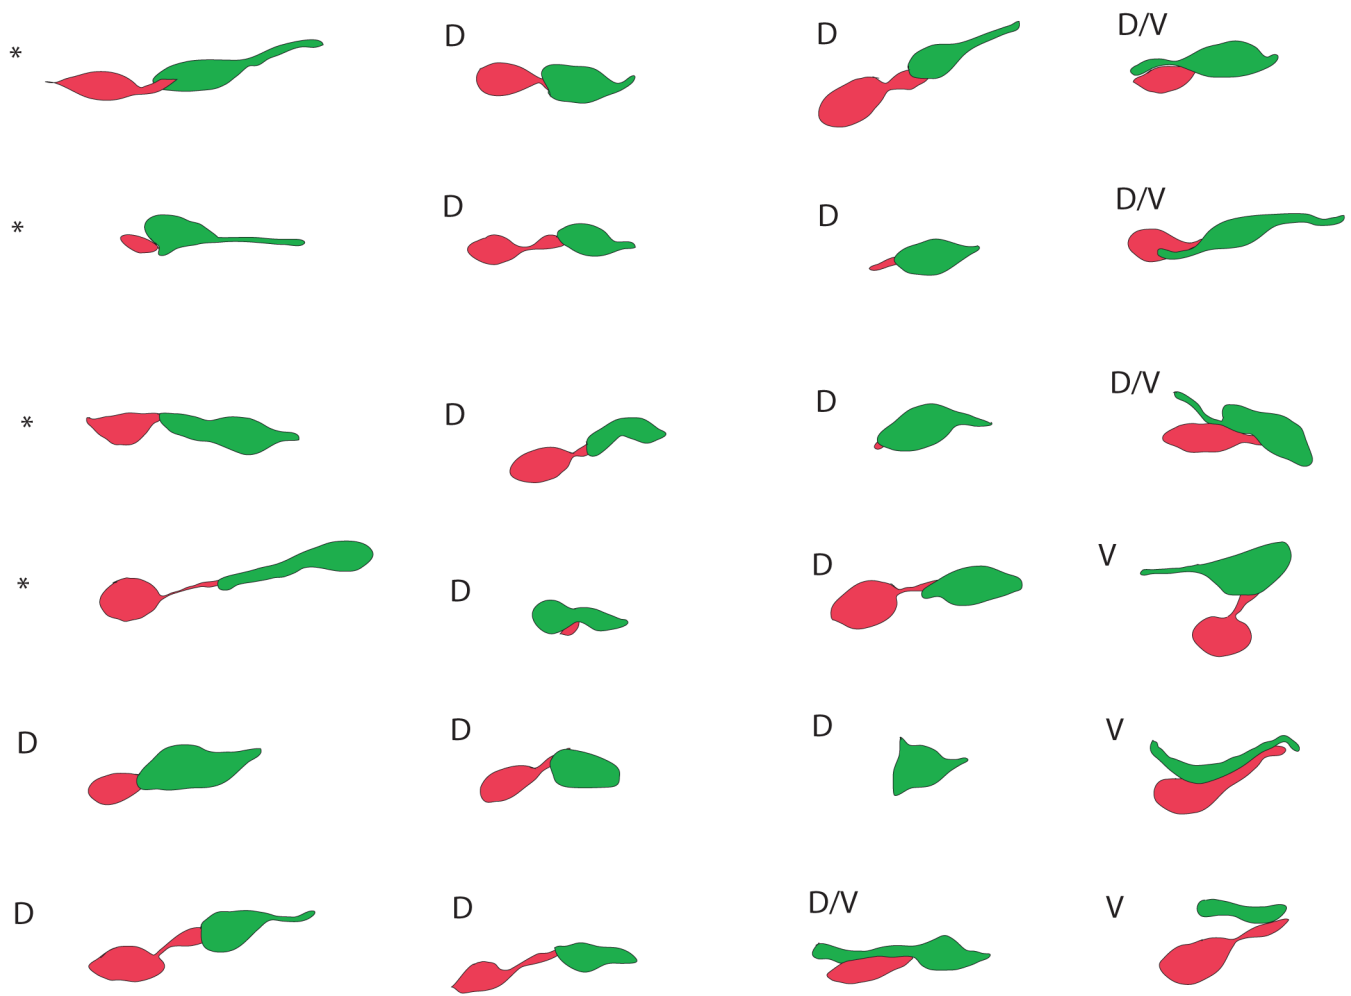

Supplement: supp_137.13.2227_047795FigS8.pdf [file supp_137.13.2227_047795FigS8.pdf]
